# Supplementary material for: Structural Characterization of Arabidopsis thaliana NAP1-Related Protein 2 (AtNRP2) and Comparison with Its Homolog AtNRP1
Source: PubMed Central journal article supplement (PMC6630525; doi:10.3390/molecules24122258), 2019-06-17
Supplement: molecules-24-02258-s001.pdf [file molecules-24-02258-s001.pdf]

## Structural characterization of *Arabidopsis thaliana* NAP1-Related Protein 2 (AtNRP2) and comparison with its homolog AtNRP1

Ashish Kumar<sup>1,2</sup>, Ajit Kumar Singh<sup>1,2</sup>, Ruchir Chandrakant Bobde<sup>1,3</sup> and Dileep Vasudevan<sup>1,\*</sup>

<sup>1</sup> Institute of Life Sciences, Bhubaneswar 751023, Odisha, India; [mail2ashish.bt@gmail.com](mailto:mail2ashish.bt@gmail.com) (A.K.); [singh.ajit325@gmail.com](mailto:singh.ajit325@gmail.com) (A.K.S.); [rckngb30593@gmail.com](mailto:rckngb30593@gmail.com) (R.C.B.)

<sup>2</sup> Manipal Academy of Higher Education, Manipal 576104, Karnataka, India

<sup>3</sup> Regional Centre for Biotechnology, Faridabad 121001, Haryana, India

\* Correspondence: dileep@ils.res.in. Tel.: +91-674-2304291; Fax: +91-674-2300728

**Supplementary Table 1: List of all the species selected for sequence and phylogenetic analysis from both monocots and dicots**

| Organism                     | Protein Name         | Gene Bank ID/NCBI Ref Seq/ Uniprot ID | Length (a.a) | Monocot/Dicot | Clade/Order         |
|------------------------------|----------------------|---------------------------------------|--------------|---------------|---------------------|
| <i>Actinidia chinensis</i>   | NRP                  | PSR89653.1                            | 204          | Dicot         | Asterids, Ericales  |
| <i>Aegilops tauschii</i>     | NRP2                 | XP_020194932.1                        | 251          | Monocot       | Commelinids, Poales |
| <i>Amborella trichopoda</i>  | NRP2                 | XP_006827206.1                        | 275          | Dicot         | Amborellales        |
| <i>Artemisia annua</i>       | NRP1                 | PWA88792.1                            | 247          | Dicot         | Asterids            |
| <i>Ananas comosus</i>        | NRP2                 | OAY75887.1                            | 256          | Monocot       | Poales              |
| <i>Arachis duranensis</i>    | NRP2                 | XP_015942681.1                        | 265          | Dicot         | Rosids, Brassicales |
| <i>Arachis ipensis</i>       | NRP2                 | XP_015942681.1                        | 265          | Dicot         | Rosids              |
| <i>Arabidopsis lyrata</i>    | NRP1                 | XP_020891472.1                        | 258          | Dicot         | Rosids              |
|                              | NRP2                 | XP_020870494.1                        | 253          |               |                     |
| <i>Asparagus officinalis</i> | NRP2-like isoform X1 | XP_020257311.1                        | 253          | Monocot       | Asparagales         |
| <i>Arabidopsis</i>           | NRP1                 | NP_177596.1                           | 256          | Dicot         | Brassicales         |

|                                |                               |                |     |         |                |
|--------------------------------|-------------------------------|----------------|-----|---------|----------------|
| <i>thaliana</i>                | NRP2                          | NP_564063.1    | 256 |         |                |
| <i>Brachypodium distachyon</i> | NRP2                          | XP_003575216.1 | 252 | Monocot | Poales         |
| <i>Brassica napus</i>          | NRP2-like                     | XP_013657249.1 | 253 | Dicot   | Brassicales    |
| <i>Cajanus cajan</i>           | NRP2 isoform X1               | XP_020234567.1 | 264 | Dicot   | Fabales        |
| <i>Carica papaya</i>           | NRP2-like                     | XP_021890590.1 | 263 | Dicot   | Brassicales    |
| <i>Capsella rubella</i>        | NRP1                          | XP_006302716.1 | 258 | Dicot   | Brassicales    |
|                                | NRP2 isoform X1               | XP_023645483.1 | 253 |         |                |
| <i>Capsicum baccatum</i>       | NRP2                          | PHT47521.1     | 260 | Dicot   | Brassicales    |
| <i>Capsicum chinense</i>       | NRP2                          | PHU23992.1     | 260 | Dicot   | Solanales      |
| <i>Cephalotus follicularis</i> | NAP domain containing protein | GAV57825.1     | 274 | Dicot   | Oxalidales     |
| <i>Chenopodium quinoa</i>      | NRP2 isoform X1               | XP_021733819.1 | 260 | Dicot   | Caryophyllales |
| <i>Citrus clementina</i>       | NRP2 isoform X1               | XP_006439603.1 | 260 | Dicot   | Sapindales     |
| <i>Citrus sinensis</i>         | NRP2 isoform X1               | XP_006476613.1 | 260 | Dicot   | Sapindales     |
| <i>Cucurbita maxima</i>        | NRP1-like                     | XP_023001094.1 | 264 | Dicot   | Cucurbitales   |
|                                | NRP2-like                     | XP_022998832.1 | 268 |         |                |
| <i>Cucurbita moschata</i>      | NRP1-like                     | XP_022923755.1 | 264 | Dicot   | Cucurbitales   |
|                                | NRP2-like                     | XP_022949102.1 | 268 |         |                |
| <i>Cynara cardunculus</i>      | NRP1 isoform X1               | XP_024972928.1 | 264 | Dicot   | Asterales      |
|                                | NRP2                          | XP_024976694.1 | 247 |         |                |

|                                   |                      |                |     |         |              |
|-----------------------------------|----------------------|----------------|-----|---------|--------------|
| <i>Dichanthelium oligosanthes</i> | NRP1                 | OEL31860.1     | 255 | Monocot | Poales       |
|                                   | NRP2                 | OEL21843.1     | 190 |         |              |
| <i>Durio zibethinus</i>           | NRP1-like            | XP_022768509.1 | 262 | Dicot   | Malvales     |
|                                   | NRP2-like            | XP_022727878.1 | 261 |         |              |
| <i>Eutrema Salsugineum</i>        | NRP1                 | XP_006390411.1 | 260 | Dicot   |              |
|                                   | NRP2 isoform X1      | XP_006416566.1 | 260 |         |              |
| <i>Glycine soja</i>               | SET                  | KHN21849.1     | 261 | Dicot   | Fabales      |
| <i>Gossypium arboreum</i>         | SET                  | KHG17103.1     | 249 | Dicot   | Malvales     |
| <i>Helianthus annuus</i>          | NRP1-like            | XP_021983899.1 | 251 | Dicot   | Asterales    |
|                                   | NRP2-like isoform X1 | XP_021978396.1 | 254 |         |              |
| <i>Hevea brasiliensis</i>         | NRP2-like            | XP_021683068.1 | 266 | Dicot   | Malpighiales |
| <i>Jatropha curcas</i>            | NRP2                 | XP_012080253.1 | 272 | Dicot   | Malpighiales |
| <i>Lactuca sativa</i>             | NRP1                 | XP_023768179.1 | 257 | Dicot   | Asterales    |
|                                   | NRP2-like isoform X1 | XP_023743356.1 | 250 |         |              |
| <i>Manihot esculenta</i>          | NRP2                 | XP_021616087.1 | 263 | Dicot   | Malpighiales |
|                                   | NRP2-like            | XP_021592793.1 | 265 |         |              |
| <i>Medicago truncatula</i>        | NRP1                 | XP_013459455.1 | 260 | Dicot   | Fabales      |
|                                   | NRP2-like Isoform X1 | XP_013457898.1 | 266 |         |              |
| <i>Momordica charantia</i>        | NRP1                 | XP_022137647.1 | 266 | Dicot   | Cucurbitales |

|                                      |                                       |                |     |         |                |
|--------------------------------------|---------------------------------------|----------------|-----|---------|----------------|
| <i>Morus notabilis</i>               | NRP1                                  | XP_010091501.2 | 264 | Dicot   |                |
| <i>Olea europaea var. sylvestris</i> | NRP2-like                             | XP_022843635.1 | 261 | Dicot   | Lamiales       |
| <i>Oryza sativa japonica</i>         | NRP2                                  | XP_015627496.1 | 262 | Monocot | Poales         |
| <i>Oryza sativa indica</i>           | Nucleosome chromatin assembly protein | ABR26120.1     | 243 | Monocot | Poales         |
| <i>Populus trichocarpa</i>           | NRP2                                  | XP_002323845.2 | 261 | Dicot   | Malpighiales   |
|                                      | NRP2-isoform X1                       | XP_024437616.1 | 272 |         |                |
| <i>Prunus avium</i>                  | NRP1                                  | XP_021820685.1 | 265 | Dicot   | Rosales        |
| <i>Prunus persica</i>                | NRP1                                  | XP_007209477.1 | 265 | Dicot   | Rosales        |
| <i>Prunus yedoensis</i>              | NRP1-like                             | PQM41797.1     | 229 | Dicot   | Rosales        |
| <i>Quercus suber</i>                 | NRP2-like isoform X1                  | XP_023927983.1 | 270 | Dicot   | Fagales        |
| <i>Ricinus communis</i>              | NRP2                                  | XP_015582059.1 | 268 | Dicot   | Malpighiales   |
| <i>Rosa chinensis</i>                | NRP2-like                             | XP_024174323.1 | 265 | Dicot   | Rosales        |
| <i>Sesamum indicum</i>               | NRP2-like                             | XP_011071637.1 | 262 | Dicot   | Lamiales       |
|                                      | NRP2-isoform X1                       | XP_011087255.1 | 263 |         |                |
| <i>Solanum tuberosum</i>             | NRP2-like                             | NP_001305500.1 | 268 | Dicot   | Solanales      |
| <i>Sorghum bicolor</i>               | NRP1                                  | XP_002447963.1 | 257 | Monocot | Poales         |
|                                      | NRP2                                  | XP_002454059.1 | 251 |         |                |
| <i>Spinacia oleracea</i>             | NRP2-like isoform X1                  | XP_021860196.1 | 262 | Dicot   | Caryophyllales |
| <i>Theobroma cacao</i>               | NRP2                                  | KHG17103.1     | 273 | Dicot   | Malvales       |

|                           |                 |                |     |         |         |
|---------------------------|-----------------|----------------|-----|---------|---------|
| <i>Trifolium pratense</i> | SET-like        | PNY13530.1     | 255 | Dicot   | Fabales |
| <i>Vigna radiata</i>      | NRP2            | XP_014507147.1 | 251 | Dicot   | Fabales |
|                           | NRP2-isoform X1 | XP_022635153.1 | 265 |         |         |
| <i>Zea mays</i>           | Uncharacterized | NP_001105066.1 | 251 | Monocot | Poales  |
| <i>Ziziphus jujuba</i>    | NRP1            | XP_015883512.1 | 263 | Dicots  | Rosales |
|                           | NRP2-like       | XP_015879370.1 | 255 |         |         |

**Supplementary Table 2: Crystallization conditions, cryo-protectant conditions and diffraction limits for AtNRP2 crystals**

| Condition number               | Crystallization condition composition               | Cryo-protectant     | Diffraction limit |
|--------------------------------|-----------------------------------------------------|---------------------|-------------------|
| AmSO4 Suite (3) [Fig 4a(i)]    | 0.2M Ammonium chloride                              | 20% PEG 400         | 3.45 Å            |
| AmSO4 Suite (25) [Fig 4a(ii)]  | 0.2 M tri-Potassium citrate, 2.2 M Ammonium sulfate | 20% MPD             | 3.5Å              |
| AmSO4 Suite (27) [Fig 4a(iii)] | 0.2 M Potassium fluoride, 2.2 M Ammonium sulfate    | 20% glycerol        | 3.42Å             |
| AmSO4 Suite (32) [Fig 4a(iv)]  | 0.2 M K/Na tartrate, 2.2 M Ammonium sulfate         | 20% ethylene glycol | No diffraction    |
| AmSO4 Suite (40) [Fig 4a(v)]   | 0.2 M Sodium fluoride, 2.2 M Ammonium sulfate       | 20% MPD             | No diffraction    |
| AmSO4 Suite (91) [Fig 4a(vi)]  | 0.1 M Tris-sodium citrate, 2.4 M Ammonium sulfate   | 20% MPD             | No diffraction    |

**Supplementary Table 3: AtNRP2 NT/CT assembly status and stability as predicted by PDBePISA**

| Formula | Composition | Stable | Surface area (Å <sup>2</sup> ) | Buried surface area (Å <sup>2</sup> ) | ΔG(int)(Kcal/mol) | ΔG(diss)(Kcal/mol) |
|---------|-------------|--------|--------------------------------|---------------------------------------|-------------------|--------------------|
|         |             |        |                                |                                       |                   |                    |

|                |                               |     |       |      |       |      |
|----------------|-------------------------------|-----|-------|------|-------|------|
| A <sub>4</sub> | A <sub>2</sub> B <sub>2</sub> | Yes | 33560 | 9100 | -74.8 | 8.2  |
| A <sub>2</sub> | AB                            | Yes | 18450 | 2800 | -27.9 | 18.7 |

**Supplementary Table 4: SAXS data collection and structure parameters**

|                                                           | AtNRP1<br>NT/CT          | AtNRP2 NT/CT            |
|-----------------------------------------------------------|--------------------------|-------------------------|
| <b>Data Collection Parameters</b>                         |                          |                         |
| Beam line                                                 | BM29 BioSAXS (ESRF)      |                         |
| Detector                                                  | PILATUS 1M               |                         |
| Beam size (mm <sup>2</sup> )                              | 0.77 X 0.77              |                         |
| Wavelength (Å)                                            | 0.998                    |                         |
| q range (Å <sup>-1</sup> )                                | 0.4-49                   |                         |
| Sample Volume                                             | 50 µl                    |                         |
| Temperature                                               | 293 K                    |                         |
| Sample Concentration                                      | 2.0-5.0 mg/ml            |                         |
| <b>Structural Parameters</b>                              |                          |                         |
| I (0) { from Guinier}                                     | 48.9                     | 39.84                   |
| R <sub>g</sub> (Å) { from Guinier}                        | 32.5                     | 30.2                    |
| I (0) { from P (r)}                                       | 48.9                     | 39.84                   |
| R <sub>g</sub> (Å) { from P (r)}                          | 32.5                     | 30.2                    |
| D <sub>max</sub> (Å)                                      | 97                       | 97                      |
| Porod Volume estimate (V <sub>p</sub> ) (Å <sup>3</sup> ) | 1.0383 × 10 <sup>5</sup> | 8.537 × 10 <sup>4</sup> |
| <b>SAXS derived Molecular mass</b>                        |                          |                         |
| From I (0) (kDa)                                          | 39.0                     | 48.0                    |
| From Porod Volume (kDa)                                   | 64.8                     | 53.3                    |
| From SAXSMow2 (kDa)                                       | 50.0                     | 53.7                    |
| Molecular mass from sequence (kDa)                        | 48.2                     | 48.2                    |

| <b>Modeling Parameters</b>               |               |               |
|------------------------------------------|---------------|---------------|
| Symmetry                                 | P1            | P1            |
| DAMAVER (20 DAMMIF P1)<br>NSD*           | 0.914 ± 0.043 | 0.933 ± 0.071 |
| <b>Software used</b>                     |               |               |
| Primary data reduction                   | PRIMUSqt      |               |
| Data Processing                          | ATSAS         |               |
| <i>Ab initio</i> analysis                | DAMMIF        |               |
| Validation and averaging                 | DAMAVER       |               |
| Computation of model intensity           | CRYSOL        |               |
| Three dimensional graphic representation | PyMOL         |               |

\* Normalized Spatial Discrepancy

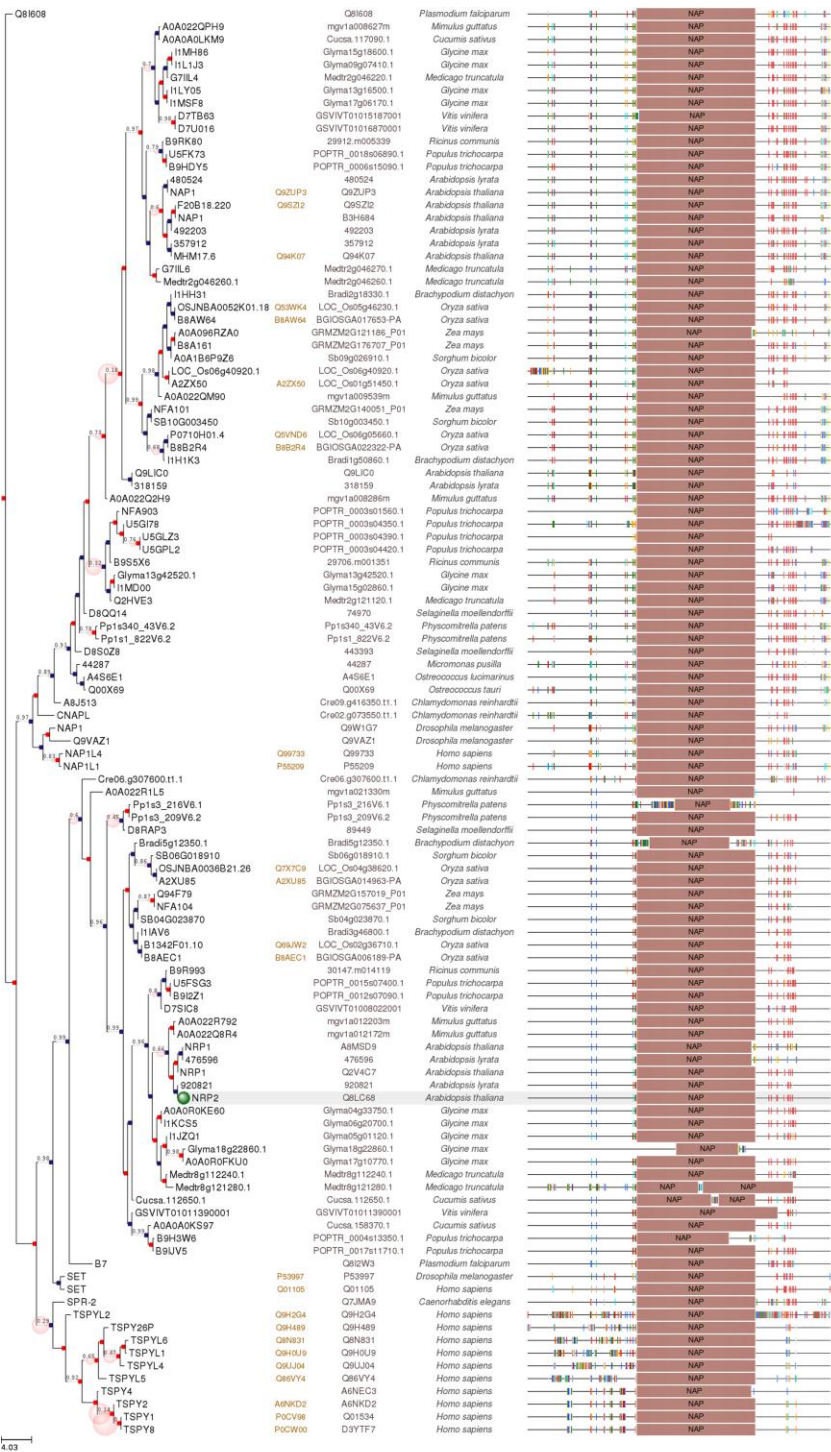

**Supplementary Figure 1.**Phylogenetic tree of NAP-domain containing proteins. AtNRP2 sequence was used as the seed sequence to search all the similar domain containing proteins and their evolutionary relationship. The figure shows that the NAP and the NAP-related proteins (NRPs and SET domain



protein) have evolved separately because of gene duplication in a single ancestral gene, followed by independent speciation events.

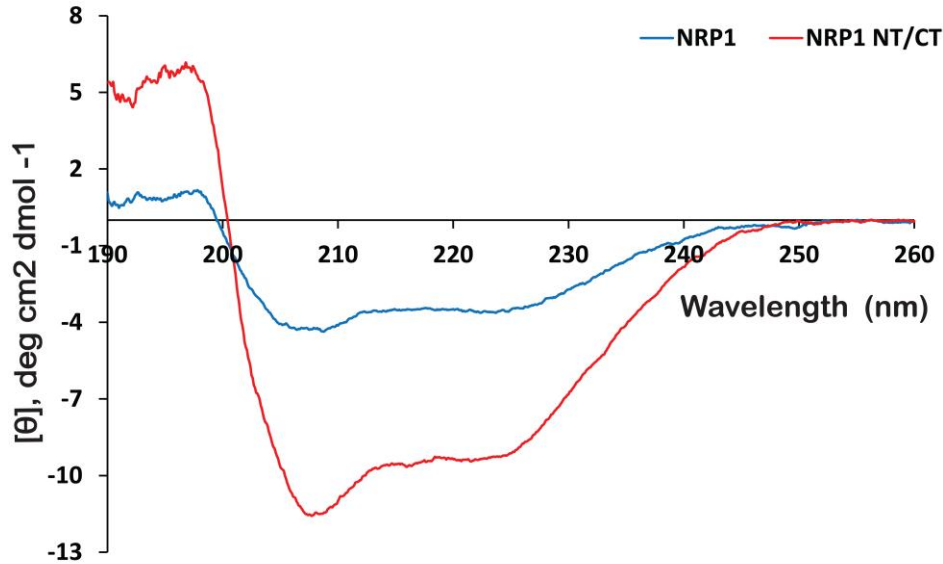

**Supplementary Figure 2.** The near-UV Circular dichroism (CD) spectroscopy profile of full-length AtNRP1 and AtNRP1 NT/CT, showing those to be predominantly  $\alpha$ -helical in composition. The CD spectrum was measured using a J-1500 Circular Dichroism spectrophotometer (Jasco).

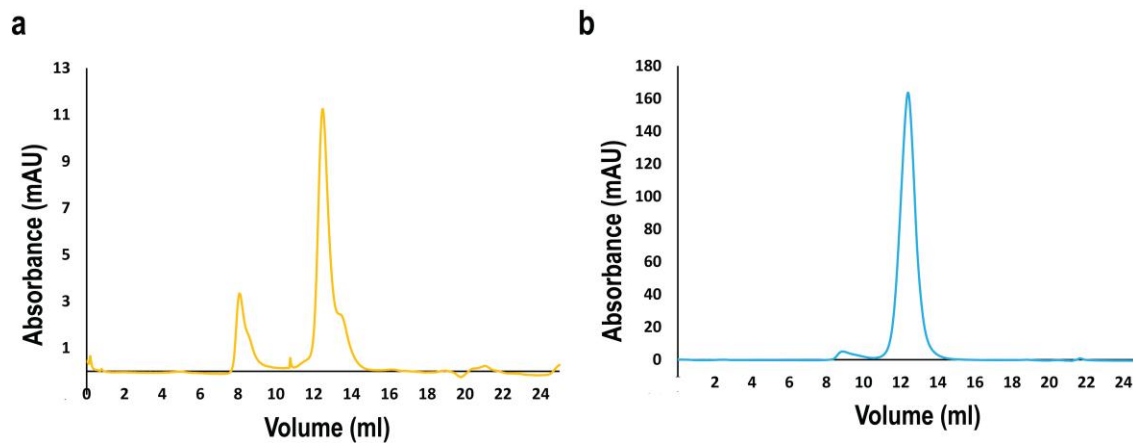

**Supplementary Figure 3.** Thermal stability of full-length AtNRP1 and full-length AtNRP2 at 60°C. **a** Chromatogram for AtNRP1 after heating at 60°C for 10 minutes. **b** Chromatogram for AtNRP2 after heating at 60°C for 10 minutes. AtNRP1 shows some amount of aggregated protein in void volume, however, AtNRP2 showed only milder aggregation.

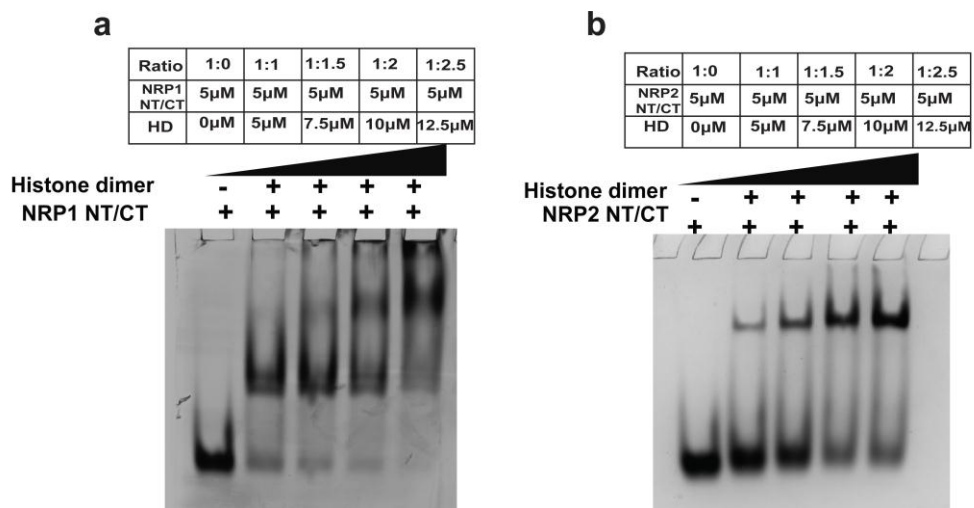

**Supplementary Figure 4.** Interaction of AtNRP1 NT/CT and AtNRP2 NT/CT with histone H2A-H2B dimer by electrophoretic mobility shift assay. **a** AtNRP1 NT/CT. **b** AtNRP2 NT/CT. H2A-H2B dimer is given as Histone dimer (HD) in the figure.
